# Supplementary material
Source: MDPI journal article supplement (https://www.mdpi.com/2073-4344/11/12/1558)
Supplement: s1 [file s1]

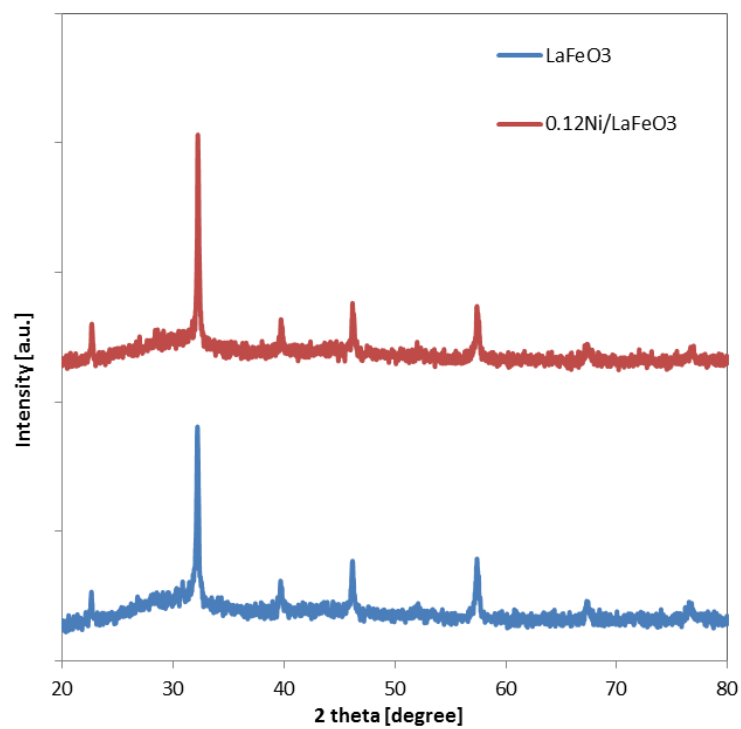

**Figure S1.** XRD patterns of LaFeO<sub>3</sub> and 0.12Ni/LaFeO<sub>3</sub> samples

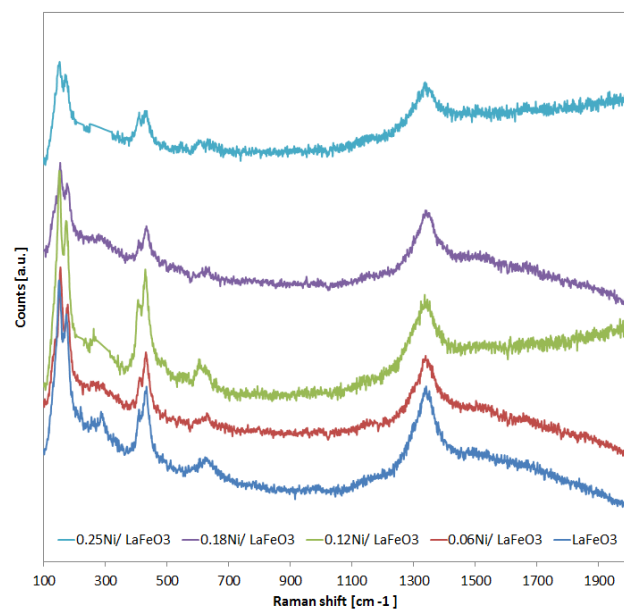

**Figure S2.** Raman spectra of the prepared sample
